# Supplementary material for: Human Mobility and Droplet-Transmissible Pediatric Infectious Diseases during the COVID-19 Pandemic
Source: MDPI journal article supplement (doi:10.3390/ijerph19116941), 2022-06-06
Supplement: s1 [file s1]

### Hand-foot-and-mouth disease

Correlation Coef. = 0.1

95%CI: -0.2 ~ 0.38

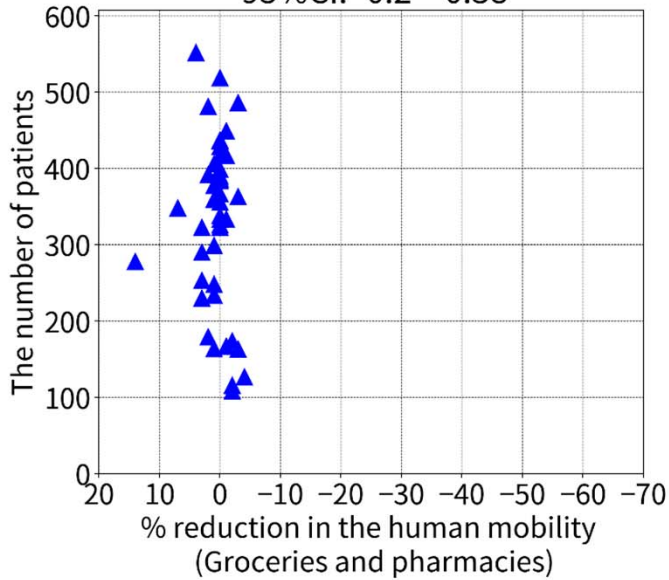

### Pharyngoconjunctival fever

Correlation Coef. = 0.54\*

95%CI: 0.3 ~ 0.72

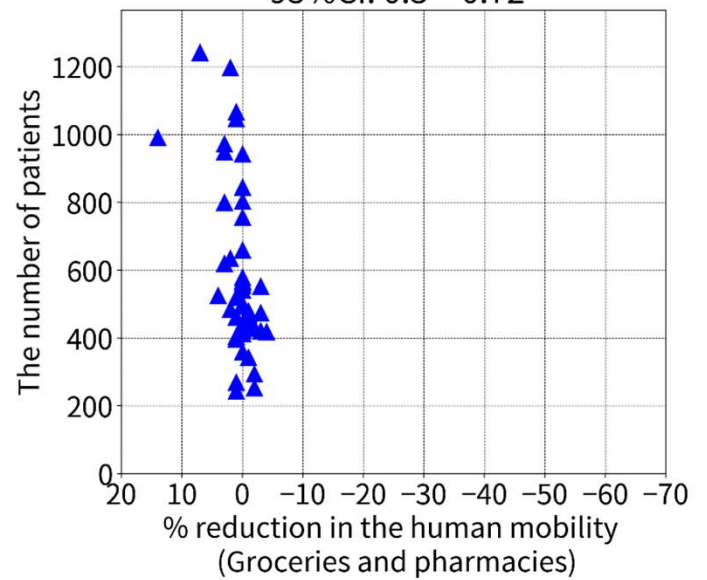

### RS virus infection

Correlation Coef. = 0.42\*

95%CI: 0.15 ~ 0.63

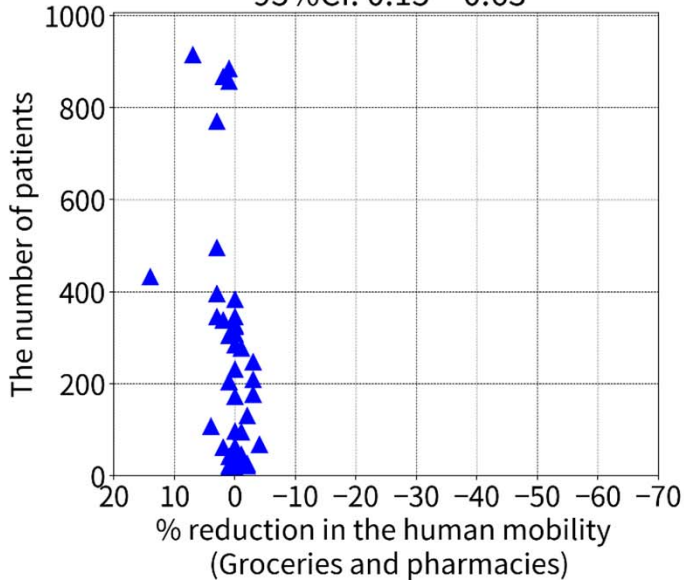

### Group A streptococcal pharyngitis

Correlation Coef. = 0.34\*

95%CI: 0.06 ~ 0.57

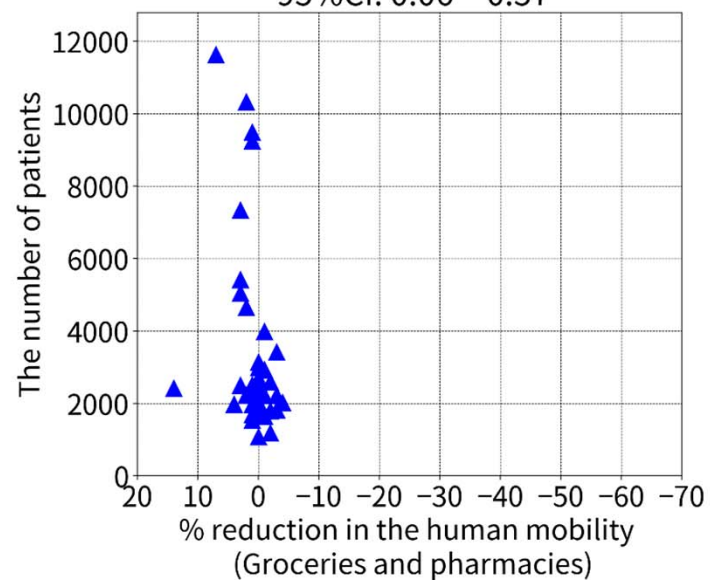

### Herpangina

Correlation Coef. = -0.07

95%CI: -0.35 ~ 0.23

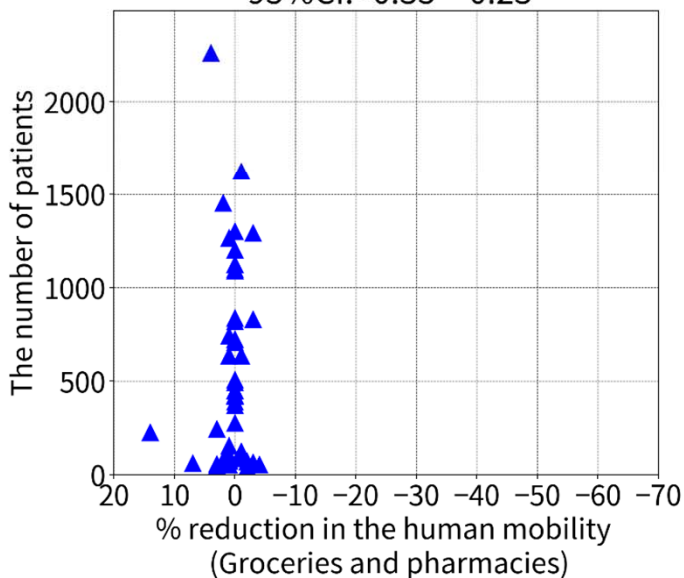

NOTE: \*Significant correlation

Supplementary  
Figure **S1**
