# Supplementary material for: Human Mobility and Droplet-Transmissible Pediatric Infectious Diseases during the COVID-19 Pandemic
Source: MDPI journal article supplement (doi:10.3390/ijerph19116941), 2022-06-06
Supplement: s1 [file s1]

### Hand-foot-and-mouth disease

Correlation Coef. = 0.1

95%CI: -0.2 ~ 0.38

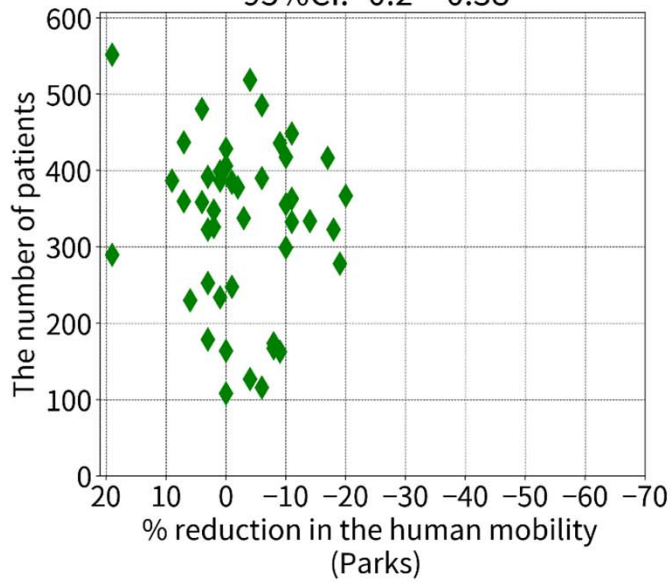

### Pharyngoconjunctival fever

Correlation Coef. = -0.04

95%CI: -0.33 ~ 0.25

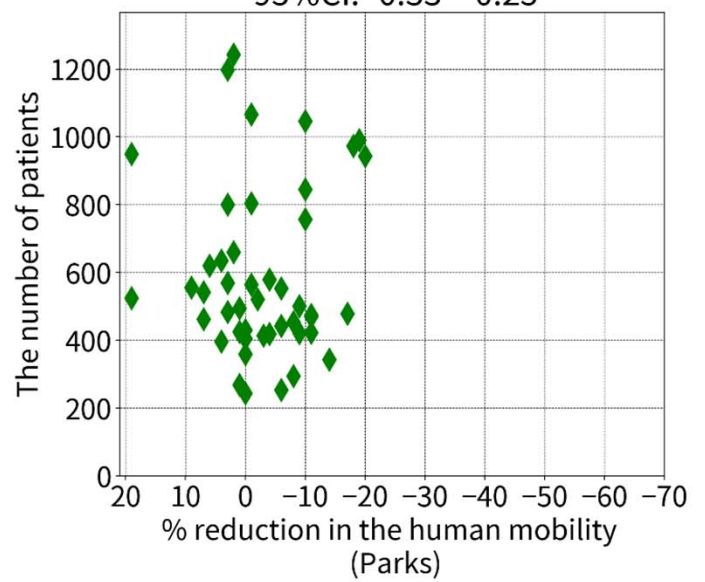

### RS virus infection

Correlation Coef. = 0.16

95%CI: -0.13 ~ 0.43

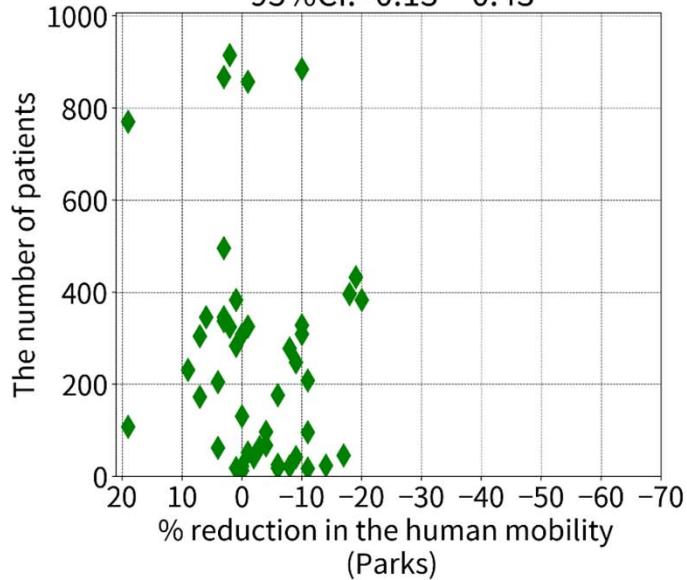

### Group A streptococcal pharyngitis

Correlation Coef. = 0.18

95%CI: -0.12 ~ 0.44

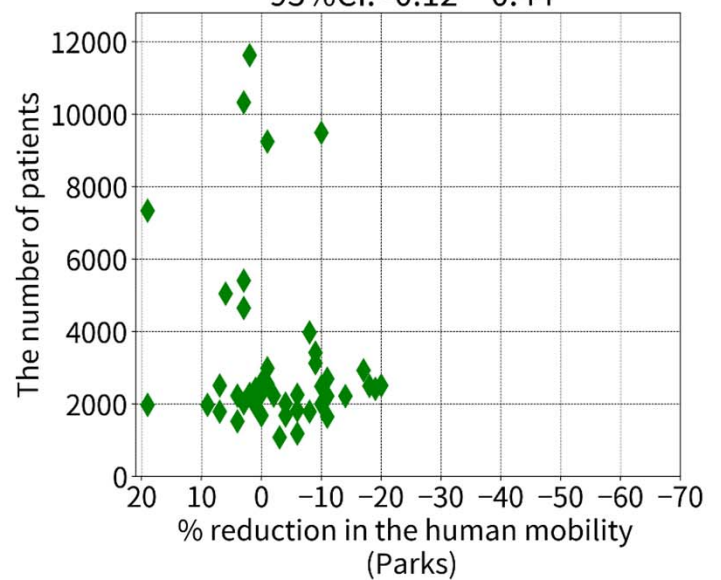

### Herpangina

Correlation Coef. = 0.23

95%CI: -0.07 ~ 0.49

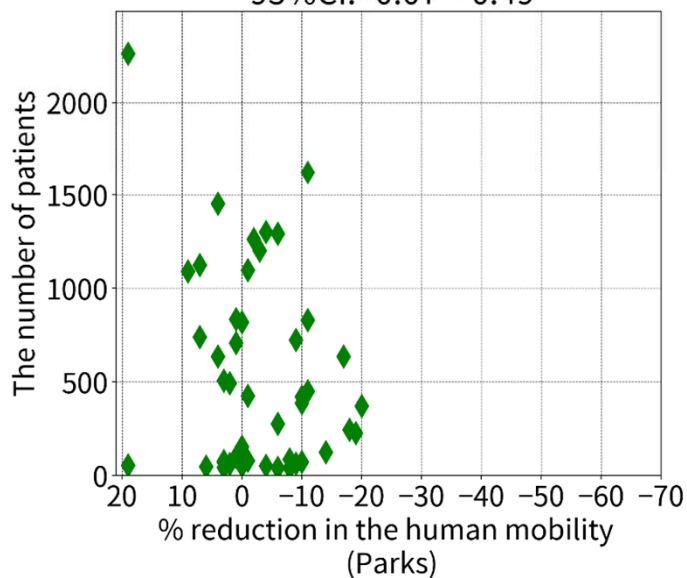

NOTE: \*Significant correlation

Supplementary  
Figure **S2**
